# Supplementary material
Source: publisher figshare collection journal article supplement (https://karger.figshare.com/ndownloader/files/33004652)
Supplement: Supplementary file 1 [file 33004652]

# Supplementary Information

**Supp Fig 1.** Clustering results according to RepeatExplorer (**a**) and TAREAN (**b**) *in silico* analysis. Y-axis represents numbers of reads of superclusters and x-axis proportions of whole analyzed reads. The number of input reads are 279,722,454 and the number of analyzed reads are 1,254,066. A total of 100,170 clusters, 100,138 superclusters and 407,916 singlets were determined using the RepeatExplorer program. The number of input reads are 136,033,700 and the number of analyzed reads are 1,042,100. A total of 61,755 superclusters and 386,009 singlets were determined using the TAREAN pipeline.

**Supp Fig 2.** Representation of two satellite repeat clusters obtained as a result of the TAREAN pipeline. Tandem repeat patterns were drawn based on bioinformatics analysis of the sequences. Vsub50 sequences (~50 bp) are centromeric repeats (**a**) and Vsub400 sequences (~400 bp) are subtelomeric repeats (**b**).

**Supp Fig 3.** PCR products obtained with a pair of primers developed for theVsub50 repeat family (**b**) and for the Vsub400 repeat family (**b**) after agarose gel electrophoresis. Fragments indicated by white arrows have been extracted and cloned. M indicates the DNA marker with appropriate sizes.

**Supp Fig 4.** A multiple sequence alignment of Vsub50 repeat family members of bambara groundnut. Clone sequences (Vsub50-1 and Vsub50-2) were compared with the Vsub50 consensus sequence (Vsub50-cons) obtained from the TAREAN pipeline. The pairwise sequence identity was 83.9 %. The monomer is tandemly repeated every ~50 bp.

**Supp Fig 5.** A multiple sequence alignment of Vsub400 repeat family from bambara groundnut. The sequences from four independent clones (Vsub400-1,Vsub400-2, Vsub400-3 and Vsub400-4) were compared with the Vsub400 consensus sequence (Vsub400-cons) obtained from the TAREAN pipeline. A pairwise identity was 98.1%. The monomer is repeated every ~400 bp.

**Supp Fig 6.** Dotplot comparison of Vsub50 and Vsub400 repeat families. **a)** The Vsub50 sequences from clones Vsub50-1 and Vsub50-2 were compared to each other. **b)** The sequence from the Vsub400-1 clone was compared with itself to show the monomer structure.

**Supp Fig 7.** Southern blot hybridization analysis of Vsub50 centromeric repeat and Vsub400 subtelomeric repeat in bambara groundnut. **a, c)** Agarose gel electrophoresis of *Dra*I (lane 1) and *Taq*I (lane 2) digested genomic DNA. **b)** Southern blot probed with the Vsub50 centromeric repeat. **d)** Southern blot probed with the Vsub400 subtelomeric repeat. M indicates the DNA marker. Note: The marker DNA cross hybridizes with the plasmid vector within the p
